# Supplementary material
Source: Springer Nature journal article supplement (https://www.springermedizin.de/resource/supplementary/12979_2010_87_MOESM6_ESM.pdf/9603382)

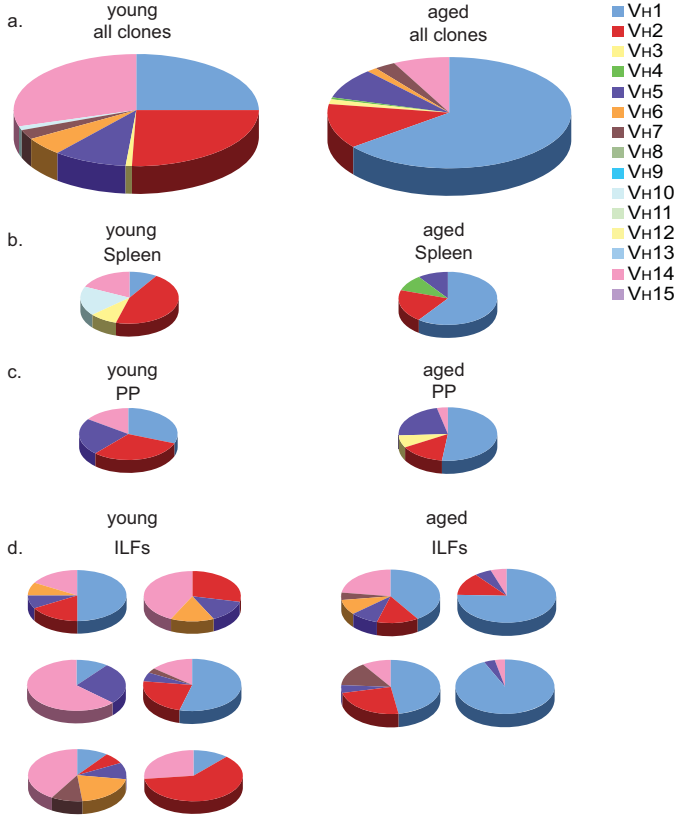

Supplement: MOESM6 [file 9603382]
